# **IQD1 involvement in hormonal signaling and general defense responses against *Botrytis cinerea***

1 **Omer Barda<sup>&</sup> and Maggie Levy\***

2 Department of Plant Pathology and Microbiology, The Robert H. Smith Faculty of Agriculture, Food  
3 and Environment, The Hebrew University of Jerusalem, Rehovot, Israel

4 <sup>&</sup> currently at the: Institute of Postharvest and Food Sciences, The Volcani Center, Agricultural  
5 Research Organization, Rishon LeZion, Israel

6

7 **\* Correspondence:**

8 Maggie Levy

9 Maggie.levy@mail.huji.ac.il

10 **Keywords: IQD1, Glucosinolates, *Botrytis cinerea*, Hormone signaling, Defense responses**

11

12

13

14

15

16

## **IQD1 involvement in plant defense**

### 17 **SUMMARY**

18 IQ Domain 1 (IQD1) is a novel calmodulin-binding protein in *A. thaliana*, which was found to be a  
19 positive regulator of glucosinolate (GS) accumulation and plant defense responses against insects. We  
20 demonstrate here that the IQD1 overexpressing line (*IQD1<sup>OXp</sup>*) is more resistant also to the  
21 necrotrophic fungus *Botrytis cinerea*, whereas an IQD1 knockout line (*iqd1-1*) is much more sensitive.  
22 Furthermore, we show that IQD1 is upregulated by Jasmonic acid (JA) and downregulated by Salicylic  
23 acid (SA). Comparison of whole transcriptome expression between *iqd1-1* and wild type revealed a  
24 substantial downregulation of genes involved in plant defense and hormone regulation. Further  
25 examination revealed a marked reduction of SA/JA signaling and increase in ethylene signaling genes  
26 in the *iqd1-1* line. Moreover, quantification of SA, JA and abscisic acids in *IQD1<sup>OXp</sup>* and *iqd1-1* lines  
27 compared to WT showed a significant reduction in endogenous JA levels in the knockout line  
28 simultaneously with increased SA levels. Epistasis relations between *IQD1<sup>OXp</sup>* and mutants defective  
29 in plant-hormone signaling indicated that IQD1 acts upstream or parallel to the hormonal pathways  
30 (JA/ET and SA) in defense response against *B. cinerea* and in regulating GS accumulation and it is  
31 dependent on JAR1 controlling indole glucosinolate accumulation. As a whole, our results suggest that  
32 IQD1 is an important defensive protein against *Botrytis cinerea* in *A. thaliana* and is integrated into  
33 several important pathways such as plant microbe perception and hormone signaling.

### 34 **SIGNIFICANCE STATEMENT**

35 IQD1 is involved in glucosinolate accumulation and in general defense responses. JA activates IQD1  
36 that acts upstream or parallel to JA/ET and SA signaling pathway while controlling glucosinolate  
37 accumulation and defense against *Botrytis cinerea* and it is dependent on JAR1 controlling indole  
38 glucosinolate accumulation.

39

## **IQD1 involvement in plant defense**

### 40 **INTRUCTION**

41 Plants must continuously adapt and protect themselves both against abiotic stressors (drought, extreme  
42 temperatures, improper lighting and excessive salinity) as well as biotic stress imposed by other  
43 organisms such as viruses, bacteria, fungi and insects. Plants are resistant to most pathogens in spite of  
44 their sessile nature because they evolved a wide variety of constitutive and inducible defense  
45 mechanisms. Constitutive defenses include preformed physical barriers composed of cell walls, waxy  
46 epidermal cuticle, bark and resins (Heath, 2000a). If the first line of defense is breached, then the plant  
47 must resort to a different set of chemical mechanisms in the form of toxic secondary metabolites and  
48 antimicrobial peptides, which are ready to be released upon cell damage (Tam *et al.*, 2015). These  
49 preformed compounds are either stored in their biologically active forms like saponins (Podolak *et al.*,  
50 2010), or as precursors that are converted to toxic antimicrobial molecules only after pathogen attack,  
51 exemplified by the glucosinolate - myrosinase system (Wittstock & Halkier, 2002). Other defense  
52 responses require the detection of the invading pathogen by the plant and the activation of inducible  
53 responses, often culminating in deliberate localized cell suicide in the form of the hypersensitive  
54 response (HR) in order to limit pathogen spread (Gilchrist, 1998, Heath, 2000b). Plants activate local  
55 defenses against invading pathogens within minutes and within hours, levels of resistance in distal  
56 tissue influenced by systemic signals mediated by plant hormones. The identity of the pathogen  
57 determines the type of systemic response. The classic dogma is that jasmonic acid (JA) and ethylene  
58 signaling activates resistance against necrotrophs while the salicylic acid (SA) signaling pathway is  
59 important to fight biotrophic pathogens, although it also plays some role in the defense against the  
60 necrotrophic fungi *Botrytis cinerea* (Ferrari *et al.*, 2003, Govrin & Levine, 2000, Vuorinen *et al.*,  
61 2021). These two pathways are mostly antagonistic and the balance of crosstalk between them affects  
62 the outcome of the pathology (Glazebrook, 2005). *B. cinerea* causes disease in more than 200 plant  
63 species including numerous economically important crops such as tomatoes and grapes (AbuQamar *et*  
64 *al.*, 2016). The fungus has a predominantly necrotrophic lifestyle that involves killing plant host cells

## **IQD1 involvement in plant defense**

65 by diverse phytotoxic compounds and degrading enzymes, after which it extracts nutrients from the  
66 dead cells. It comprises nearly 300 genes of Carbohydrate-Active enZymes (CAZymes) and selectively  
67 attacks the cell wall polysaccharide substrates depending on the carbohydrate composition of the  
68 invaded plant tissue (Blanco-Ulate *et al.*, 2014). Plant defense response against this pathogen is  
69 complex and involves many genes related to phytohormone signaling, including the ethylene, abscisic  
70 acid, JA, and SA pathways (Kliebenstein *et al.*, 2005).

71 Glucosinolates (GS) are sulfur rich anionic secondary metabolites characteristic of the crucifers (the  
72 Brassicaceae family) with important biological and economic roles in plant defense and human  
73 nutrition. Currently, there are approximately 140 naturally produced GS described in the literature  
74 (Nguyen *et al.*, 2020). They all share a common chemical structure, consisting of a  $\beta$ -D-glucopyranose  
75 residue linked via a sulfur atom to a (Z)-N-hydroximosulfate ester, plus a variable R group. GS are  
76 divided into three classes according to their precursor amino acid: compounds derived from  
77 methionine, alanine, leucine, isoleucine or valine are called aliphatic GS, those derived from  
78 phenylalanine or tyrosine are called aromatic GS and those derived from tryptophan are called indole  
79 GS. The various ecotypes of the model plant *A. thaliana* produce about 40 different GS of the indole  
80 and methionine derived aliphatic families. Glucosinolates become biologically active only in response  
81 to tissue damage, when they are enzymatically cleaved by special thioglucoside glucohydrolases  
82 known as myrosinases. These enzymes hydrolyze the glucose moiety of the GS, creating an unstable  
83 aglycone that can rearrange to form nitriles, thiocyanates, isothiocyanates and other active products.  
84 To prevent damage to the plant itself, spatial compartmentalization separates the myrosinases, which  
85 are mainly stored in specialized myrosin cells, from the GS substrates found in the vacuoles throughout  
86 the plant cells (Halkier & Gershenzon, 2006). In recent years it was demonstrated that GS metabolism  
87 is an important component of the plant defense response also against fungi and other microbial  
88 pathogens (Buxdorf *et al.*, 2013, Bednarek *et al.*, 2009, Clay *et al.*, 2009). Regulation of GS metabolism  
89 is a complex process involving all major plant defense hormones (SA, JA, ABA and ethylene) but also

## **IQD1 involvement in plant defense**

90 other hormones such as gibberellic acid, brassinosteroids and auxin are involved (Mitreiter &  
91 Gigolashvili, 2021). Six R2R3-MYB transcription factors are known to be positive regulators of GS  
92 biosynthesis, MYB28, MYB29 and MYB76 affect aliphatic GS (Li *et al.*, 2013), whereas MYB34,  
93 MYB51 and MYB122 regulate indole GS (Frerigmann & Gigolashvili, 2014, Mitreiter & Gigolashvili,  
94 2021). IQD1 also has been found to be a positive regulator of GS accumulation and plant defense  
95 responses against insects (Levy *et al.*, 2005). IQD1 is part of a family that comprises 33 IQD genes, all  
96 possessing a distinct plant specific domain of 67 conserved amino acids termed the IQ67 domain. IQ67  
97 is characterized by a unique and repetitive arrangement of IQ, 1-5-10 and 1-8-14 calmodulin  
98 recruitment motifs (Abel *et al.*, 2005). IQD genes are not unique to *A. thaliana* and bioinformatics and  
99 molecular tools have identified IQD genes in other plants such as rice, tomato, soybean, grapevine and  
100 others (Huang *et al.*, 2013, Filiz *et al.*, 2013, Feng *et al.*, 2014, Ma *et al.*, 2014, Cai *et al.*, 2016, Wu *et*  
101 *al.*, 2016, Yuan *et al.*, 2019, Li *et al.*, 2020). IQD genes in the plant kingdom play diverse roles  
102 unrelated to glucosinolate synthesis or defense mechanisms. A set of microarray studies directed  
103 towards identifying DELLA responsive genes identified the *A. thaliana* IQD22 as one of several  
104 proteins involved in early response to gibberellin (Zentella *et al.*, 2007). The tomato IQD12 homolog  
105 SUN protein was found to be a major factor controlling the elongated fruit shape of tomato fruits (Xiao  
106 *et al.*, 2008). Using virus-induced gene silencing (VIGS) method, two IQD family proteins from the  
107 cotton producing *Gossypium hirsutum* (GhIQD31 and GhIQD32), were found to induce drought and  
108 salt stress tolerance (Yang *et al.*, 2019). Recent studies identified the kinesin light chain-related protein-  
109 1 (KLCR1) as an IQD1 interactor in *A. thaliana* and demonstrated association of IQD1 with  
110 microtubules. They suggest that IQD1 and related proteins provide scaffolds for facilitating cellular  
111 transport of RNA along microtubular tracks, as a mechanism to control and fine-tune gene expression  
112 and protein sorting (Abel *et al.*, 2013, Bürstenbinder *et al.*, 2013). The *A. thaliana* IQD16 was also  
113 implicated as being a microtubule-associated protein affecting cortical microtubules ordering, apical  
114 hook formation and cell expansion (Li *et al.*, 2020). In the current work, we aimed to elucidate the

## IQD1 involvement in plant defense

115 mechanism of action of the IQD1 protein in *A. thaliana* and define its involvement in hormone  
116 signaling and in basal defense against *Botrytis cinerea*.

## 117 RESULTS

### 118 IQD1 expression level correlates with *B. cinerea* resistance

119 Inoculation analysis with *Botrytis cinerea* *B. cinerea* demonstrate that the IQD1 overexpressing line  
120 (*IQD1<sup>OXp</sup>*) is more resistant to the necrotrophic fungus, whereas an IQD1 knockout line (*iqd1-1*) is  
121 much more sensitive (**Figure 1**).

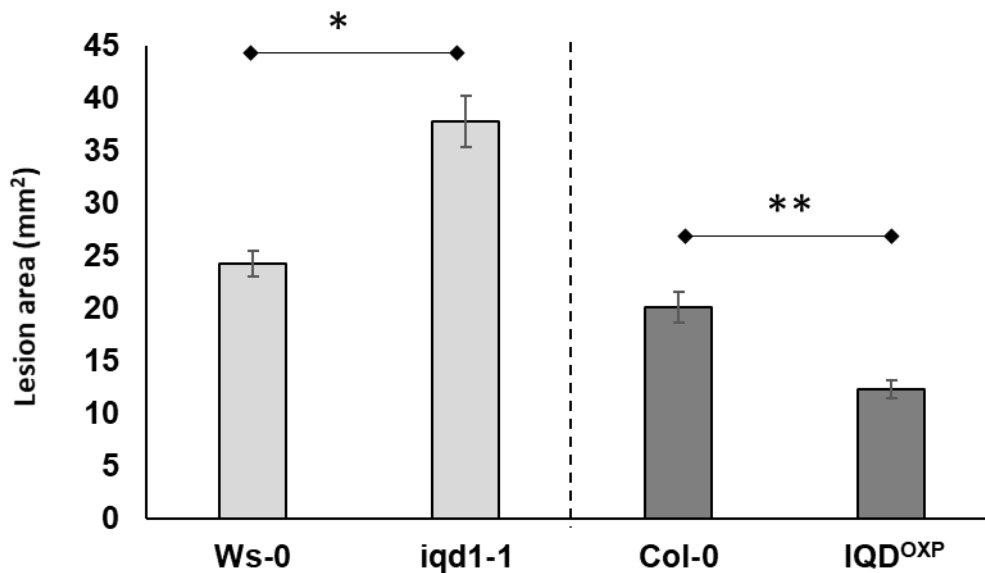

122

123

124 **Figure 1. Pathogenicity of *B. cinerea* on Arabidopsis plants.** Shown are averages of lesion size (mm<sup>2</sup>) of *B. cinerea* (Grape)  
125 on parental WT plants (Ws-0 or Col-0) and on IQD1 knockout line *iqd1-1* or overexpressor line IQD1<sup>OXp</sup>. Each column  
126 represents an average of 20 leaves with standard error bars indicated. Asterisks above the columns indicate statistically  
127 significant differences at P<0.05 from the corresponding WT, as determined using the Student t-test.

128

129

130

131

132 **Transcriptional characterization of the IQD1 knockout line**

## **IQD1 involvement in plant defense**

### 133 ***Global gene expression analysis of *iqd1-1* vs WT plants***

134 In order to evaluate the molecular changes underlying the impact of *IQD1* expression, we performed  
135 global gene expression on RNA samples from WT and *iqd1-1* rosette leaves 48 hours after *B. cinerea*  
136 or mock inoculation.

137 A summary of parsed reads for each of the four samples of reads mapped to the *A. thaliana* genome is  
138 provided in **Table S1**. Our analysis revealed that 48 hours post mock inoculation, a total of 3508 genes  
139 were differentially expressed at least four-fold in *iqd1-1* knockout plants compared with WT *A.*  
140 *thaliana* (**Figure S1A and Table S2**). Among these genes, 1054 were upregulated in mock treated  
141 *iqd1-1* (downregulated in WT), yet more than double this number - 2454 genes exhibited  
142 downregulation in the *iqd1-1* mutant (expressed higher in WT). Eighteen genes were selected for qRT-  
143 PCR analysis in order to validate the RNA-Seq data, 7 genes that were upregulated in mock treated  
144 *iqd1-1* vs. WT and 11 genes that were downregulated in the same experiment. Expression ratios  
145 obtained by qRT-PCR were plotted versus the respective RNA-Seq values, showing that the qRT-PCR  
146 is in agreement with RNA-Seq data (**Figure S1B**).

### 147 ***Functional annotation of DEGs***

148 Functional annotation of our data revealed that there are many more significantly downregulated  
149 clusters in the *iqd1-1* mutant than upregulated ones. The downregulated protein families possess a wide  
150 array of functions such as molecular motors, DNA organization and repair, trans-membrane  
151 transporters, gene regulation and defense response (**Figure 2A**). It is important to notice that the second  
152 most downregulated cluster constitute the nucleotide-binding domain leucine-rich repeat (NB-LRR)  
153 plant resistance genes. These proteins are involved in the detection and initiation of specific plant  
154 defenses against diverse pathogen groups. The fact that many NB-LRR genes are expressed lower in  
155 the *iqd1-1* knockout plants, may contribute to these line's sensitivity to pests (Levy et al., 2005). The

## IQD1 involvement in plant defense

156 upregulated clusters in *iqd1-1* are mainly comprised of water and lipid transporters and ethylene  
 157 signaling genes, yet with lower enrichment scores than the downregulated clusters.

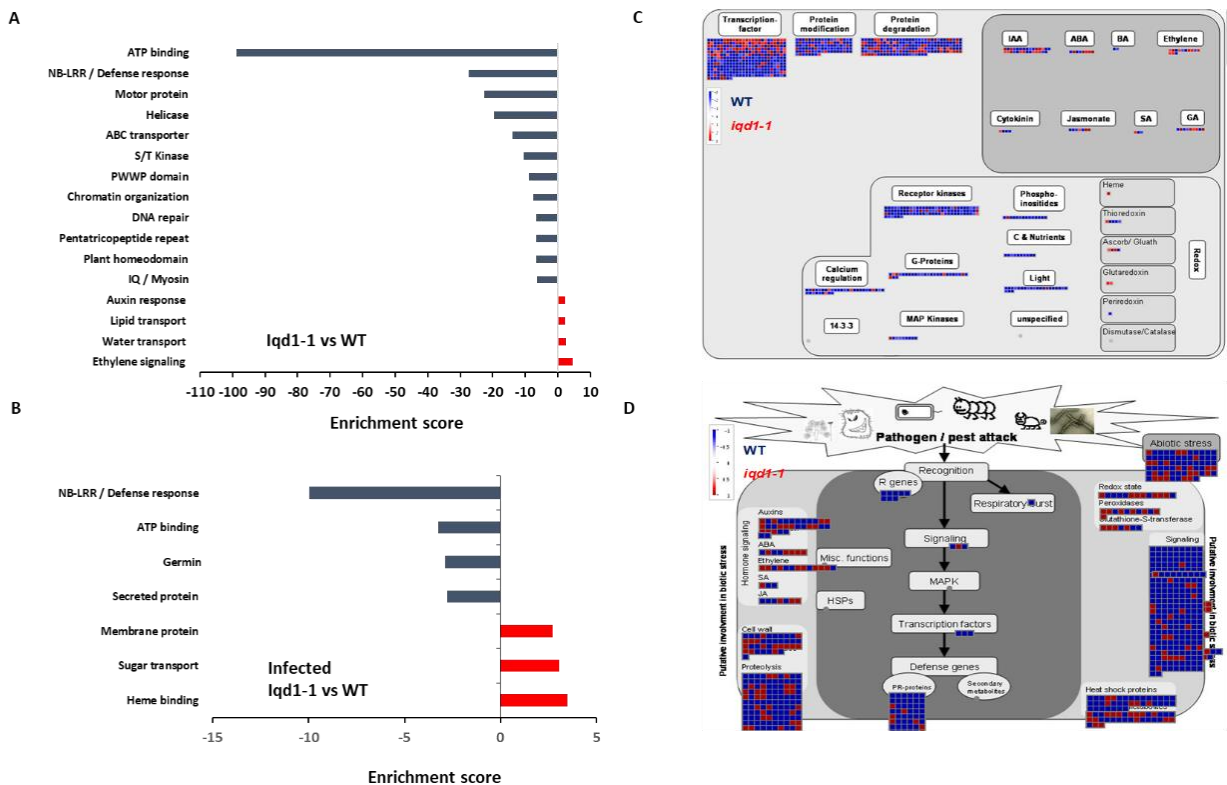

158

159 **Figure 2. Differentially expressed clusters and genes in *iqd1-1* vs. WT plants.** Enriched annotation terms of functional-  
 160 related genes were grouped into clusters using the DAVID bioinformatics resources website. Positive enrichment terms  
 161 denote upregulated clusters in *iqd1-1* while negative values denote upregulated clusters in WT plants. **A.** Differentially  
 162 expressed clusters and genes in *iqd1-1* vs. WT plants, **B.** Differentially expressed clusters in infected *iqd1-1* vs. infected WT  
 163 plants. **C-D.** MapMan regulation overview map showing differences in transcript levels between *iqd1-1* and WT. Red  
 164 squares represent higher gene expression in mock treated *iqd1-1* plants while blue squares represent higher gene expression  
 165 in mock treated WT plants, Regulatory network(C), Stress response network(D).

166

167 As demonstrated in Figure 2C, most of the genes assigned to plant cell regulation are downregulated  
 168 in *iqd1-1* as compare to WT without any infection (**Figure 2C**, blue squares). These genes mainly  
 169 function as transcription factors, protein modification and degradation, receptor kinases and hormone  
 170 signaling. The only exception are ethylene-signaling genes, which are mostly upregulated in *iqd1-1*  
 171 compared to WT (**Figure 2C**, red squares).



## **IQD1 involvement in plant defense**

172 When we looked at DEGs in *iqd1-1* vs. WT that are connected to biotic stress, we found that most of  
173 the genes responsible for plant defense are downregulated in the *iqd1-1* mutant (Figure 2D, blue  
174 squares) including heat shock proteins, pathogenesis-related proteins, peroxidases and other stress  
175 response proteins. In light of the above, we can speculate that *iqd1-1* plants are impaired in sensing,  
176 signal transducing and responding to pathogen attacks. Furthermore, most of the 69 DEGs responsible  
177 for abiotic stress response are also downregulated in the *iqd1-1* mutant. They include heat shock  
178 proteins, dehydration-responsive proteins and molecular chaperones, implying impaired response to  
179 abiotic stressors as well as biotic ones. The list of depicted genes with their descriptions and fold change  
180 values are given in **Table S3**.

### ***Comparison of B. cinerea infected iqd1-1 and WT plants***

182 We found that 48 hours post inoculation with the necrotrophic fungi *B. cinerea*, 2210 genes were  
183 upregulated and 3129 genes were downregulated in infected WT compared to mock treated plants  
184 (**Figure S1A** and **Table S4**). Whereas 2343 genes were upregulated and 3092 were downregulated in  
185 infected *iqd1-1* compared to the mock treated mutant plants (Figure S1A and Table S5). Using the  
186 DAVID web resource revealed that extensive changes in gene expression occurred both in WT (**Figure**  
187 **S2**) and in *iqd1-1* knockout plants (**Figure S3**) after infection. In both cases, clusters that comprise  
188 gene families that participate in photosynthesis are markedly downregulated (negative values) upon  
189 infection, as the plant is tuned in to fight the invading pathogen. Upregulated clusters (positive values)  
190 consist of plant defense protein families.

191 Direct comparison of DEGs in infected *iqd1-1* vs. infected WT plants shows that 702 genes are  
192 upregulated in the infected mutant, while 850 genes are upregulated in infected WT plants (**Table S6**).  
193 Analysis of our RNA-Seq results revealed that WT plants express more NB-LRR resistance genes and  
194 the defensive cell-wall associated glycoproteins germins, which are induced upon pathogen recognition

## **IQD1 involvement in plant defense**

195 **(Figure 2B** negative values). On the other hand, infected *iqd1-1* plants overexpress heme-binding  
196 proteins and sugar transporters **(Figure 2B**, positive values).

## **Involvement of IQD1 in hormone signaling and glucosinolate biosynthesis**

### ***Expression of plant hormone related genes in iqd1-1***

199 RNA-Seq transcriptional analysis of *iqd1-1* compared to WT revealed substantial changes in gene  
200 expression in the mutant. Many of the DEGs are involved in hormone regulation and signaling (Table  
201 1). Our analysis revealed that 35 hormone related genes were upregulated at least fourfold in *iqd1-1*  
202 plants and 37 genes were downregulated. While genes in the SA and JA pathways were mostly  
203 downregulated in *iqd1-1*, ethylene-signaling genes were noticeably upregulated. Three of the four  
204 downregulated genes in the JA pathway are lipoxygenases (*lox1*, *lox5* and *lox6*) that function as JA  
205 activated defense genes against biotic infection (López *et al.*, 2011, Grebner *et al.*, 2013, Viswanath *et*  
206 *al.*, 2020). The fourth gene (*At1G09400*) is an NADPH dehydrogenase taking part in the JA  
207 biosynthesis pathway (Breithaupt *et al.*, 2001) . The most downregulated hormone related gene  
208 (*At3G21950*, 114.1 fold) is a salicylic acid carboxyl methyltransferase, responsible of producing a  
209 volatile methyl ester functioning as signaling molecule in systemic defense against pathogens (Chen *et*  
210 *al.*, 2003). Five of the eight upregulated ethylene pathway genes belong to ERF/AP2 transcription  
211 factor family (*erf9*, *erf14*, *erf15*, *erf59* and *erf98*). These genes encode for ethylene response factor  
212 proteins that regulate the expression of defense responses genes following ethylene perception (Müller  
213 & Munné-Bosch, 2015). Taken together, our data indicate that IQD1 is involved in all plant hormone  
214 pathways, with strong emphasis on the major defense hormones (SA, JA and ethylene).

215

216

217

## IQD1 involvement in plant defense

218

**Table 1.** Hormone related genes differentially expressed in *iqd1-1* plants vs. WT (FC>4).

| Gene ID                 | Gene Description                                              | FC     | Gene ID               | Gene Description                                       | FC     |
|-------------------------|---------------------------------------------------------------|--------|-----------------------|--------------------------------------------------------|--------|
| <b>Auxin</b>            |                                                               |        | <b>Ethylene</b>       |                                                        |        |
| AT1G51780               | ILL5 (IAA-Leucine resistant Like 5)                           | 3.243  | AT5G20550             | 2OG-Fe(II)-dependent oxygenase                         | 4.475  |
| AT1G76190               | Auxin-responsive family protein                               | 3.182  | AT1G06160             | ORA59 (Octadecanoid-Responsive Arabidopsis AP2/ERF 59) | 2.536  |
| AT3G07900               | O-fucosyltransferase family protein                           | 3.013  | AT3G23230             | ERF98 (Ethylene Response Factor 98)                    | 2.354  |
| AT2G18010               | Auxin-responsive family protein                               | 2.887  | AT2G31230             | ERF15 (Ethylene-responsive element binding factor 15)  | 2.326  |
| AT5G55250               | IAMT1 (IAA carboxyl methyltransferase)                        | 2.749  | AT1G04370             | ERF14 (Ethylene-responsive element binding factor 14)  | 2.235  |
| AT4G34810               | Auxin-responsive family protein                               | 2.408  | AT5G44210             | ERF9 (ERF domain protein 9)                            | 2.178  |
| AT5G18060               | Auxin-responsive family protein                               | 2.256  | AT5G67430             | Acyl-CoA N-acyltransferase                             | 2.106  |
| AT5G18030               | Auxin-responsive family protein                               | 2.223  | AT2G30830             | 2OG-dependent dioxygenase                              | 2.086  |
| AT4G34800               | Auxin-responsive family protein                               | 2.205  | AT1G01480             | ACS2 (ACC Synthase 2)                                  | -2.038 |
| AT5G18010               | Auxin-responsive family protein                               | 2.14   | AT3G04580             | EIN4 (Ethylene Insensitive 4)                          | -2.086 |
| AT3G03830               | Auxin-responsive family protein                               | 2.112  | AT5G09410             | EICBP.B (Ethylene Induced Calmodulin Binding Protein)  | -2.655 |
| AT3G03840               | Auxin-responsive family protein                               | 2.068  | AT5G59530             | 2OG-dependent dioxygenase                              | -5.299 |
| AT2G21220               | Auxin-responsive family protein                               | 2.013  | AT1G12010             | ACC oxidase                                            | -6.656 |
| AT1G60680               | Aldo/keto reductase family protein                            | -2.075 | <b>Cytokinin</b>      |                                                        |        |
| AT5G20730               | ARF7 (Auxin Response Factor 7)                                | -2.167 | AT3G23630             | IPT7 (Isopentenyltransferase 7)                        | 2.128  |
| AT3G54100               | O-fucosyltransferase family protein                           | -2.177 | AT5G35750             | AHK2 (Arabidopsis Histidine Kinase 2)                  | -2.616 |
| AT2G02560               | CAND1 (cullin-Associated and Neddylation-Dissociated 1)       | -2.204 | AT2G01830             | CRE1 (Cytokinin Response 1)                            | -2.95  |
| AT1G60730               | Aldo/keto reductase family protein                            | -2.32  | AT2G17820             | AHK1 (Arabidopsis Histidine Kinase 1)                  | -3.485 |
| AT5G13320               | PBS3 (A VRPPHB Susceptible 3)                                 | -2.57  | <b>Jasmonic Acid</b>  |                                                        |        |
| AT2G34680               | AIR9 (Auxin-Induced in Root Cultures 9)                       | -2.638 | AT1G54040             | ESP (Epithiospecifier protein)                         | 6.444  |
| AT5G09410               | CAMTA1 (Calmodulin-Binding Transcription Activator 1)         | -2.655 | AT2G25980             | Jacalin lectin family protein                          | 3.153  |
| AT1G28130               | GH3.17 (IAA amido synthetase)                                 | -2.749 | AT5G42650             | AOS (Allene Oxide Synthase)                            | 2.081  |
| AT4G27260               | GH3.5 (IAA amido synthetase)                                  | -2.985 | AT3G22400             | LOX5 (Lipoxygenase 5)                                  | -2.215 |
| AT5G54510               | GH3.6 (IAA amido synthetase)                                  | -2.986 | AT1G09400             | 12-oxophytodienoate reductase                          | -2.366 |
| AT5G55540               | TRN1 (Tornado 1)                                              | -3.084 | AT1G67560             | LOX6 (Lipoxygenase 6)                                  | -2.631 |
| AT2G23170               | GH3.3 (IAA amido synthetase)                                  | -3.096 | AT1G55020             | LOX1 (Lipoxygenase 1)                                  | -3.703 |
| AT3G02260               | ASA1 (Attenuated Shade Avoidance 1)                           | -4.216 | <b>Salicylic Acid</b> |                                                        |        |
| AT4G37390               | GH3.2 (IAA amido synthetase)                                  | -4.285 | AT1G66690             | SAM-dependent methyltransferase                        | 2.235  |
| <b>Abscisic Acid</b>    |                                                               |        | AT4G36470             | SAM-dependent methyltransferase                        | -2.103 |
| AT5G15960               | KIN1 (cold and ABA inducible protein)                         | 7.291  | AT3G21950             | SAM-dependent methyltransferase                        | -6.834 |
| AT2G17770               | BZIP27 transcription factor                                   | 4.182  | <b>Gibberellin</b>    |                                                        |        |
| AT1G75700               | HVA22G (HVA22-like protein G)                                 | 2.861  | AT3G46500             | 2OG-Fe(II)-dependent oxygenase                         | 3.967  |
| AT3G02480               | ABA-responsive protein-related                                | 2.671  | AT5G59845             | Gibberellin-regulated family protein                   | 3.182  |
| AT2G47770               | TSPO (Outer membrane Tryptophan-rich Sensory Protein-related) | 2.485  | AT5G37490             | U-box domain-containing protein                        | 2.774  |
| AT2G27150               | AAO3 (Abscisic Aldehyde Oxidase 3)                            | -2.233 | AT1G75750             | GASA1 (GAST1 protein homolog 1)                        | 2.354  |
| AT1G16540               | ABA3 (ABA Deficient 3)                                        | -2.427 | AT1G22690             | Gibberellin-regulated family protein                   | 2.155  |
| AT3G43600               | AAO2 (Abscisic Aldehyde Oxidase 2)                            | -3.307 | AT3G11540             | SPY (Spindly)                                          | -2.026 |
| <b>Brassinosteroids</b> |                                                               |        | AT4G25420             | GA20OX1 (Gibberellin 20-Oxidase 1)                     | -2.309 |
| AT3G20780               | BIN3 (Brassinosteroid Insensitive 3)                          | -2.064 | AT1G52820             | 2OG-Fe(II)-dependent oxygenase                         | -2.565 |
| AT1G74360               | Leucine-rich repeat transmembrane protein kinase              | -3.282 | AT3G10185             | Gibberellin-regulated family protein                   | -2.795 |

219

## **IQD1 involvement in plant defense**

### 220 *Activation of IQD1 by hormones*

221 We observed that a large number of genes responsible for defense hormone response were altered in  
222 the *iqd1-1* line as compared to WT in the RNA-Seq results. This prompted us to investigate the effect  
223 of exogenous hormones and elicitors treatments on IQD1 expression in Arabidopsis seedlings. To this  
224 end, we used the *IQD1<sup>pro</sup>:GUS* reporter line that contains a fusion of the IQD1 promoter to a  $\beta$ -  
225 glucuronidase enzyme (Sundaresan *et al.*, 1995). Histochemical staining of the reporter plants  
226 following treatment with SA or Flg22, a known activator of the SA signal transduction, showed a  
227 marked downregulation of *IQD1* expression as evident by decreased GUS staining (**Figure 3A**). In  
228 contrast, application of free JA or chitin, a major component of fungal cell walls, led to activation of  
229 *IQD1* expression, further confirming the link between *IQD1* activity and the JA pathway (**Figure 3B**).

230 We also extracted plant hormones from *iqd1-1* mutant plants and revealed significantly lower JA levels  
231 compared to WT *A. thaliana*. We also observed significantly increased SA levels but no difference in  
232 ABA levels. However, there were no changes in JA, SA or ABA content in *IQD1<sup>oxp</sup>* plants (Figure  
233 3C). These results might suggest the role of IQD1 in JA accumulation and/or the synergistic effect  
234 between JA and SA signaling.

## IQD1 involvement in plant defense

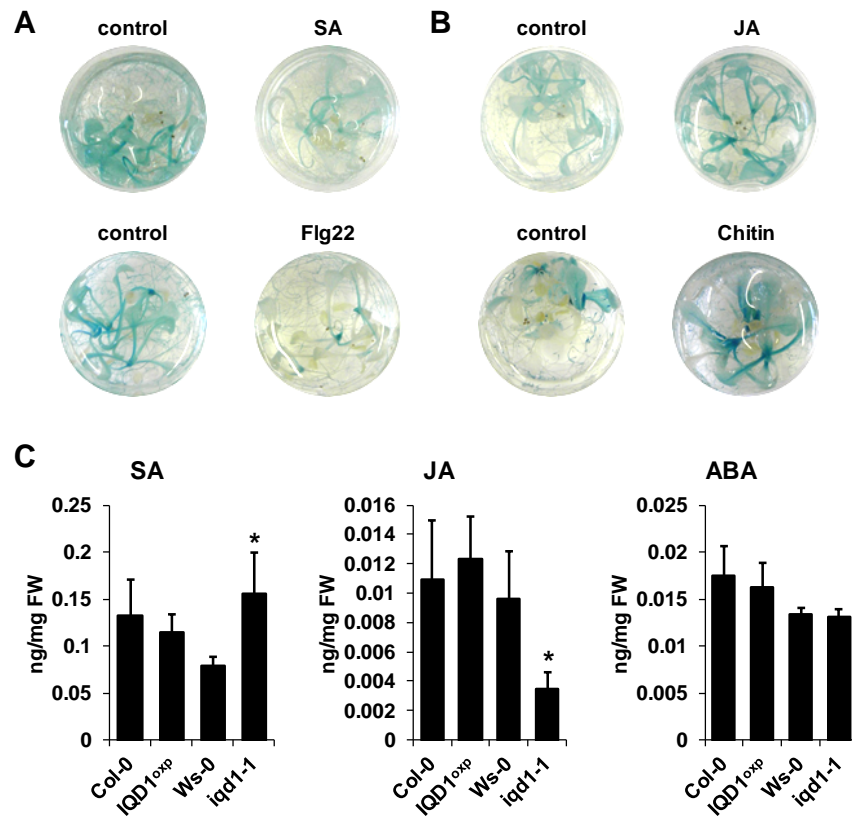

235

236 **Figure 3. Elicitors effect on IQD1 expression.** Transgenic seedlings of gene trap line *IQD1<sub>pro</sub>:GUS* were treated with  
237 100 $\mu$ M salicylic acid, 100nM Flg22 (A), 100 $\mu$ M jasmonic acid, 500  $\mu$ g/mL chitin (B) or an equal volume of water as control  
238 for 18 hours prior to histochemical GUS staining. (C) SA, JA and ABA accumulation in IQD1 mutants. Plant hormones  
239 were extracted from 3 weeks old *Arabidopsis* seedlings grown on half strength MS agar plates. Quantitative analysis of plant  
240 hormones was accomplished using LC-MS/MS system and isotopically labeled analogues were used as internal standards.  
241 Each column represents an average of 3 biological replicates with standard error bars indicated. Asterisks above the columns  
242 indicate statistically significant differences compared to WT at P<0.05, as determined using student's t-test.

243

### 244 *Dissection of IQD1 integration into defense signaling pathways*

245 In order to investigate IQD1's integration into defense hormone signaling pathways, we tested the  
246 epistatic relationships between *IQD1* and *A. thaliana* mutated in hormone signaling. We constructed  
247 double mutants by crossing the *IQD1<sup>oxp</sup>* line to mutants defective in plant-hormone signaling. Epistasis  
248 with the SA mutant *NahG* showed increased sensitivity of the single mutant compared to WT and  
249 *IQD1<sup>oxp</sup>*, a phenotype that was not abolished in the *NahG:IQD1<sup>oxp</sup>* double mutant plants (Figure 4A).  
250 We also determined the GS concentration in the crosses' siblings and found that aliphatic GS content  
251 is reduced in both the single and double *NahG* mutant lines as compared to WT and *IQD1<sup>oxp</sup>* (Figure  
252 4B). We observed no difference in disease severity or GS accumulation in the SA regulator mutant line

## IQD1 involvement in plant defense

253 *npr1* or the *npr1:IQD1<sup>OXp</sup>* cross (Figure 4A, 4B), suggesting that the dependence of GS content on SA  
254 is downstream or parallel to IQD1.

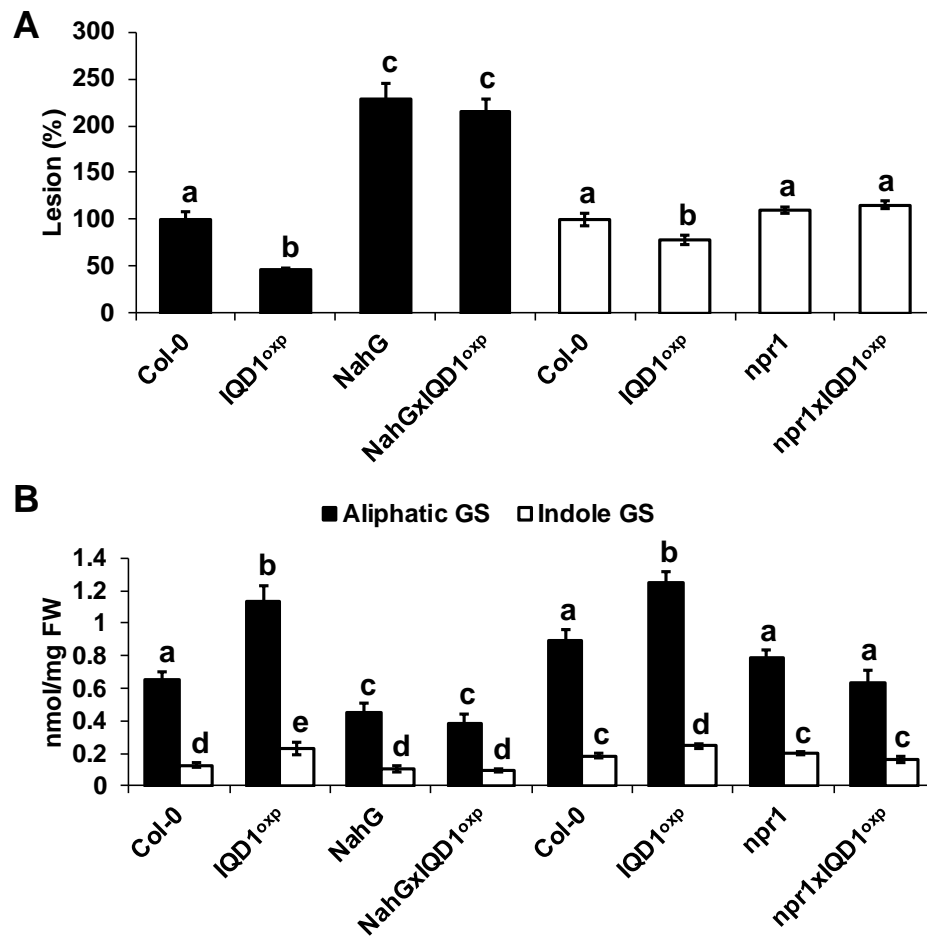

255

256 **Figure 4. *IQD1<sup>OXp</sup>* effect on SA pathway mutants.** (A) Six weeks old *Arabidopsis* detached leaves of SA pathway mutants  
257 were inoculated with *B. cinerea*. Lesion size was measured 72h post inoculation. Average lesion sizes from 30 leaves of each  
258 line are presented along with the standard error of each average. All numbers are presented as the relative percentage to their  
259 corresponding background wild-type. Different letters above the columns indicate statistically significant differences at  
260  $P < 0.05$ , as determined using the Tukey's honest significant difference test. (B) Glucosinolates were extracted from six weeks  
261 old *Arabidopsis* seedlings of SA pathway mutants and analyzed by HPLC. Mean contents of methionine-derived (black bars)  
262 and tryptophan-derived (gray bars) glucosinolates are given for each line. Each column represents an average of 8 seedlings  
263 with standard error bars indicated. Different letters above the columns indicate statistically significant differences at  $P < 0.05$ ,  
264 as determined using the Tukey's honest significant difference test.

265 All three JA signaling pathway mutant lines (*aos*, *coi1* and *jar1*) and their crosses with *IQD1<sup>OXp</sup>* were  
266 more resistant to *B. cinerea* infection as compared to WT. While *aos* and *aos:IQD1<sup>OXp</sup>* exhibited an  
267 intermediary resistance falling between *IQD1<sup>OXp</sup>* and WT, and *coi1* and its crossed siblings were  
268 undistinguished from *IQD1<sup>OXp</sup>*, *jar1* and the *jar1:IQD1<sup>OXp</sup>* crossed line displayed an exceptionally high  
269 resistance to *B. cinerea*, surpassing even that of *IQD1<sup>OXp</sup>* (Figure 5A). However, while GS content in

## IQD1 involvement in plant defense

270 *aos:IQD1<sup>OXp</sup>* and *coi1:IQD1<sup>OXp</sup>* remained unchanged compared to the parental lines, the *jar1:IQD1<sup>OXp</sup>*  
 271 siblings displayed altered GS content. Indole GS content in the *jar1* plants was higher even than the  
 272 *IQD1<sup>OXp</sup>* line. Indole GS concentration in the *jar1:IQD1<sup>OXp</sup>* siblings were lower than the *jar1* parent  
 273 plants and comparable to WT levels (**Figure 5B**), suggesting that IQD1 is involved in the JA signaling  
 274 pathway upstream or parallel to JAR1 and dependent on JAR1 controlling indole GS accumulation.

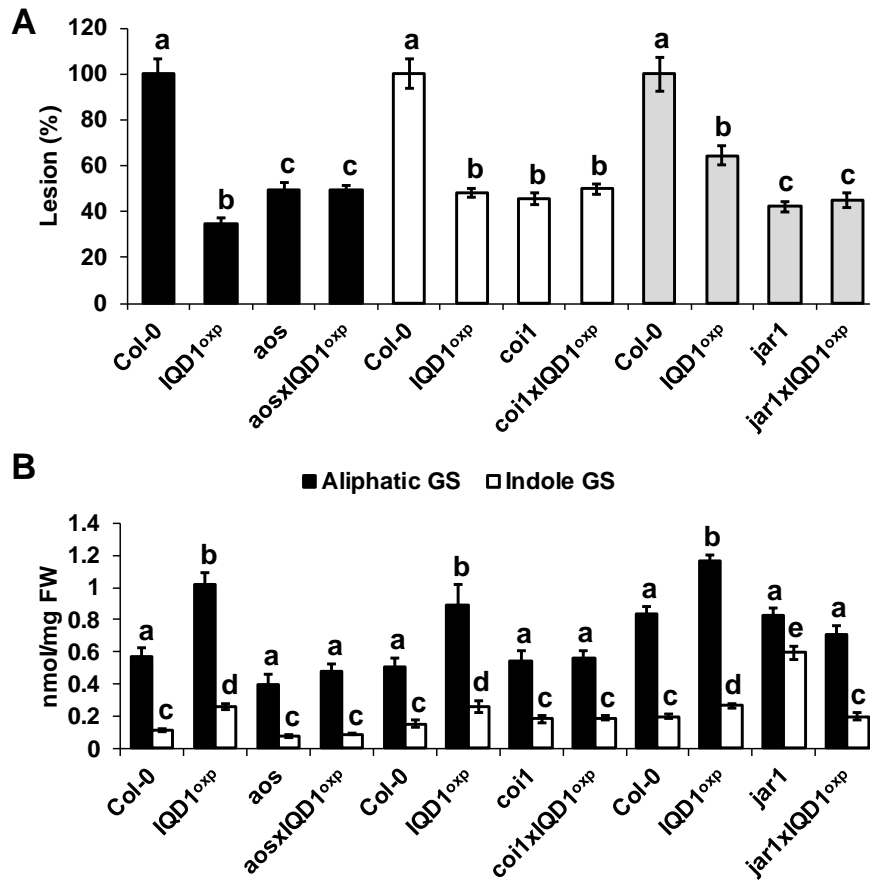

275

276 **Figure 5. *IQD1<sup>OXp</sup>* effect on JA pathway mutants.** (A) Six weeks old *Arabidopsis* detached leaves of JA pathway mutants  
 277 were inoculated with *B. cinerea*. Lesion size was measured 72h post inoculation. Average lesion sizes from 30 leaves of each  
 278 line are presented along with the standard error of each average. All numbers are presented as the relative percentage to their  
 279 corresponding background wild-type. Different letters above the columns indicate statistically significant differences at  
 280  $P < 0.05$ , as determined using the Tukey's honest significant difference test. (B) Glucosinolates were extracted from six weeks  
 281 old *Arabidopsis* seedlings of SA pathway mutants and analyzed by HPLC. Mean contents of methionine-derived (black bars)  
 282 and tryptophan-derived (gray bars) glucosinolates are given for each line. Each column represents an average of 8 seedlings  
 283 with standard error bars indicated. Different letters above the columns indicate statistically significant differences at  $P < 0.05$ ,  
 284 as determined using the Tukey's honest significant difference test.

285



## IQD1 involvement in plant defense

286 As demonstrated in **Figure 6A**, *Arabidopsis* mutants in ethylene signaling, *ein2* and *eto1*, were more  
 287 sensitive to *B. cinerea* as compared both to WT and to *IQD1<sup>OXF</sup>*. Siblings of *ein2:IQD1<sup>OXF</sup>* and  
 288 *eto1:IQD1<sup>OXF</sup>* failed to complement this phenotype. Although indole GS levels in *eto1* plants and the  
 289 crossed line *eto1:IQD1<sup>OXF</sup>* were higher even than *IQD1<sup>OXF</sup>*, it did not reflect on these lines' resistance  
 290 to *B. cinerea* infection (**Figure 6B**), suggesting that IQD1 acts upstream or in parallel to the ethylene  
 291 components EIN2 and ETO1.

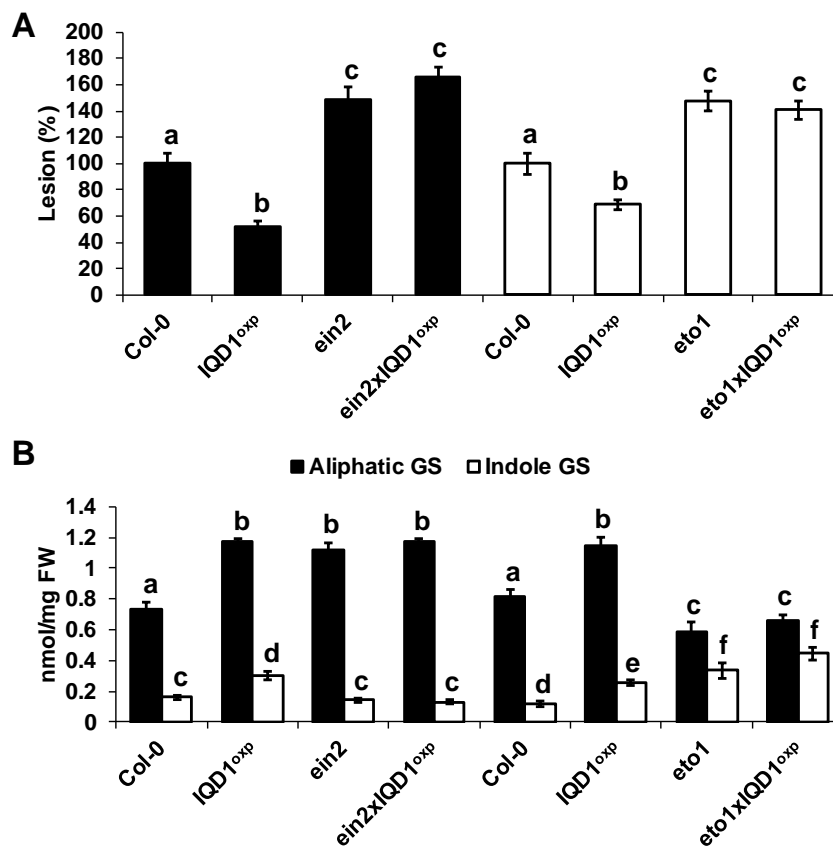

292

293 **Figure 6. *IQD1<sup>OXF</sup>* effect on ethylene pathway mutants. (A)** Six weeks old *Arabidopsis* detached leaves of ethylene  
 294 pathway mutants were inoculated with *B. cinerea*. Lesion size was measured 72h post inoculation. Average lesion sizes from  
 295 30 leaves of each line are presented along with the standard error of each average. All numbers are presented as the relative  
 296 percentage to their corresponding background wild-type. Different letters above the columns indicate statistically significant  
 297 differences at  $P < 0.05$ , as determined using the Tukey's honest significant difference test. **(B)** Glucosinolates were extracted  
 298 from six weeks old *Arabidopsis* seedlings of SA pathway mutants and analyzed by HPLC. Mean contents of methionine-  
 299 derived (black bars) and tryptophan-derived (gray bars) glucosinolates are given for each line. Each column represents an  
 300 average of 8 seedlings with standard error bars indicated. Different letters above the columns indicate statistically significant  
 301 differences at  $P < 0.05$ , as determined using the Tukey's honest significant difference test.



## IQD1 involvement in plant defense

### 302 *Involvement of IQD1 in GS biosynthesis*

303 RNA-Seq transcriptional analysis of *iqd1-1* compared to WT revealed altered expression of GS related  
304 genes. Our analysis shows that out of seven DEGs, six were downregulated in the mutant and only one  
305 was upregulated (**Figure S4**) and summarized in Table 2. Among the genes that were downregulated  
306 we find *mam1*, that encodes a methylthioalkylmalate synthase which catalyzes the condensation  
307 reactions of the first two rounds of methionine chain elongation in the biosynthesis of methionine-  
308 derived glucosinolates (Textor *et al.*, 2004). The *fmo gs-ox2*, that encodes a glucosinolate S-oxygenase  
309 that catalyzes the conversion of methylthioalkyl glucosinolates to methylsulfinylalkyl glucosinolates  
310 (Li *et al.*, 2008). The *cyp79b2* that belongs to the cytochrome P450 family and is involved in tryptophan  
311 metabolism (Mikkelsen *et al.*, 2000). *Tgg2* a myrosinase gene involved in catabolizing GS into active  
312 products (Barth & Jander, 2006), and the *gll23* a myrosinase associated protein (Jancowski *et al.*,  
313 2014) and *esm1* that represses nitrile formation and favors isothiocyanate production during  
314 glucosinolate hydrolysis (Zhang *et al.*, 2006). The only upregulated GS related gene in *iqd1-1* was *esp*,  
315 an epithiospecifier protein that promotes the creation of nitriles instead of isothiocyanates during  
316 glucosinolate hydrolysis (Lambrix *et al.*, 2001). These results corroborate the active role that IQD1  
317 participates in different steps of GS biosynthesis, as seen earlier in loss- and gain-of-function *A.*  
318 *thaliana* lines (Levy *et al.*, 2005).

319 **Table 2.** Differentially expressed genes involved in GS biosynthesis and hydrolysis in *iqd1-1* as compare to WT

| # | Gene name  | Description                    | Log <sub>2</sub> (fold change) |
|---|------------|--------------------------------|--------------------------------|
| 1 | ESP        | Epithiospecifier               | 6.44                           |
| 2 | CYP79B2    | Tryptophan metabolism          | -2.14                          |
| 3 | MAM1       | Methylthioalkylmalate synthase | -2.18                          |
| 4 | FMO GS-OX2 | GS S-oxygenase                 | -2.87                          |
| 5 | GLL23      | Myrosinase associated protein  | -2.94                          |
| 6 | ESM1       | Represses nitrile formation    | -6.10                          |
| 7 | TGG2       | Myrosinase                     | -8.92                          |

320

321

322

## **IQD1 involvement in plant defense**

### 323 **Involvement of IQD1 in *Botrytis cinerea* pathogenicity**

324 In this study, we also analyzed the gene expression profiles of *B. cinerea* infecting the *IQD1* knockout  
325 of *A. thaliana* (*iqd1-1* mutant) compared to infection of WT plants. For statistical analysis of raw data  
326 for each sample after sequencing, see **Table S7**.

### 327 ***Identification of B. cinerea DEGs following WT and iqd1-1 infection***

328 Unique reads that perfectly matched reference genes in each library (*B. cinerea* infecting WT or *iqd1-*  
329 *1*) were used to generate a matrix of normalized counts and perform statistical tests to determine  
330 whether genes are differentially expressed between pairs of factors combinations. *B. cinerea* genes  
331 with less than four-fold differences either infecting WT or infecting *iqd1-1* plants were excluded from  
332 further analyses (**Table S8**). The frequency of genes with the different fold changes in expression is  
333 shown in **Figure S5A**. A total of 678 *B. cinerea* genes were differentially expressed when it was  
334 infecting the *iqd1-1* mutant compared to the WT (fold change > 4), this includes 466 upregulated genes  
335 (expressed higher when infecting the *iqd1-1* mutant, positive values on the Y-axis) and 212  
336 downregulated genes (expressed higher when infecting the WT, negative values on the Y-axis). Of the  
337 upregulated DEGs, 391 genes (84%) have a fold change between 4-20 and 75 genes (16%) are changed  
338 over 20-fold, reaching to a near 4000-fold difference. 194 genes (92%) of the downregulated DEGs  
339 have a fold change that is lower than 10 and only 18 genes (8%) changed more than 10-fold.

340 To validate the RNA-Seq data, six genes were selected for qRT-PCR analysis: *Bc1G\_11623* (MFS  
341 sugar transporter), *Bc1G\_10358* (hypothetical protein), *Bc1G\_04691* (cellulase), *Bc1G\_02144*  
342 (choline dehydrogenase), *Bc1G\_12885* (MFS transporter), *Bc1G\_13938* (sialidase). The expression  
343 patterns of these genes obtained by qRT-PCR and RNA-Seq are similar, indicating that the results from  
344 the RNA-Seq data are indicative of the *B. cinerea* transcriptome (**Figure S5B**).

## **IQD1 involvement in plant defense**

### 345 ***Functional annotation of B. cinerea DEGs after infection of iqd1-1 mutant***

346 The Blast2Go bioinformatics software was used in order to identify the functions of genes in the  
347 annotated *B. cinerea* genome, as more than 85% of the genes were not assigned a function (Staats and  
348 van Kan, 2012). Based on the overall analysis of gene expression profiles presented we were able to  
349 find blast hits to 460 upregulated genes (98.7%) and GO (Gene Ontology) annotations to 268 genes  
350 (57.5%) for *B. cinerea* infecting *iqd1-1*. The proteins encoded by the DEGs are mainly located in the  
351 plasma membrane, when classified by cellular components (**Figure 7A**). When calcified by biological  
352 processes and molecular function these proteins exhibit hydrolase activity, oxidoreductase activity and  
353 trans-membrane transporter activity and they participate in carbohydrate catabolism, oxidation-  
354 reduction processes and molecule transport across the plasma membrane (**Figure 7A**). As stated above,  
355 only 212 *B. cinerea* genes displayed higher expression levels when infecting WT plants compared to  
356 the *iqd1-1* mutant. Moreover, the difference in expression (fold change) amounted to less than 20 at  
357 most. Using the Blast2Go software, we managed to find blast hits to 204 DEGs (96.2%) and GO  
358 annotations to 115 genes (54.2%). The proteins encoded by the DEGs show a propensity for nuclear  
359 localization, when classified for cellular component. Their molecular function exhibit nucleic acid  
360 binding, helicase and kinesin activity and they participate macromolecule and nucleobase biological  
361 metabolic processes and in gene expression (**Figure 7B**).

## IQD1 involvement in plant defense

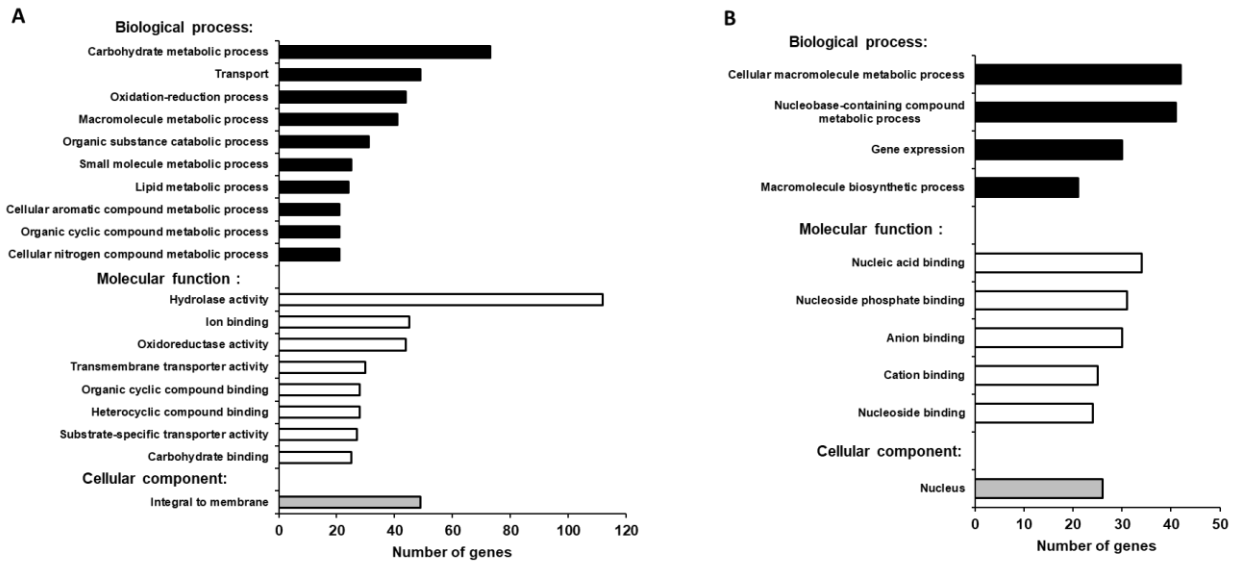

362

363 **Figure 7. GO enrichment analysis of upregulated *B. cinerea* genes.** Significantly enriched GO terms classified by  
364 biological process, molecular function and cellular component when infecting *iqd1-1* (A) or when infecting WT (B). Only  
365 GO terms applied to more than 20 differentially expressed genes are shown.

366

### 367 *Highly expressed genes of B. cinerea after infection of iqd1-1 plants*

368 To further elucidate the specific functions of the DEGs, *B. cinerea* genes with more than 50-fold  
369 changes in their expression while infecting *iqd1-1* were further analyzed. This comprised the top 30  
370 upregulated *B. cinerea* genes while infecting *iqd1-1* (Table 3). The most abundant group of proteins  
371 belongs to the Carbohydrate-Active-Enzymes (CAZymes) involved in the degradation of complex  
372 carbohydrates (Garron & Henrissat, 2019). In fact, 20 out of the 30 genes (67%) in this list are  
373 CAZymes that participate in the breaking down of the host plant's primary and secondary cell wall.  
374 These genes encode enzymes such as cellulases, hemicellulases, pectinases and other related proteins.  
375 Seven of the DEGs (23%) belong to the Major Facilitator Superfamily (MFS) and exhibited more than  
376 50-fold change in expression. MFS are a class of membrane proteins that facilitate the transport of  
377 small solutes such as sugars and antibiotics across the cell membrane (Yan, 2015, Niño-González *et*  
378 *al.*, 2019). The remaining three genes in the list encode for a fungal extracellular membrane protein

## IQD1 involvement in plant defense

379 with anticipated role in pathogenesis, a transmembrane protein with proposed glucose transport activity  
380 and a hypothetical protein with an unknown function.

381 **Table 3** *B. cinerea* differentially expressed genes with more than 50-fold change in their expression while  
382 infecting *iqd1-1* as compare to WT

| Gene annotation                | Log <sub>2</sub> (FC) | Gene annotation             | Log <sub>2</sub> (FC) |
|--------------------------------|-----------------------|-----------------------------|-----------------------|
| Cellulase                      | 11.96                 | Hemicellulase               | 6.49                  |
| Extracellular membrane protein | 11.57                 | MFS sugar transporter       | 6.43                  |
| Cellulase                      | 11.28                 | MFS sugar transporter       | 6.32                  |
| Cellulase                      | 10.46                 | MFS sugar transporter       | 6.26                  |
| Hemicellulase                  | 9.06                  | Cellulase                   | 6.1                   |
| Cellulase                      | 9.06                  | Hemicellulase               | 6.09                  |
| Cellulase                      | 7.78                  | Hypothetical protein        | 6.04                  |
| Transmembrane protein          | 7.57                  | Cellulosome complex protein | 5.95                  |
| Cellulase                      | 7.56                  | Pectinase                   | 5.94                  |
| Hemicellulase                  | 7.13                  | MFS transporter             | 5.82                  |
| Cellulase                      | 7.12                  | Cellulase                   | 5.79                  |
| MFS sugar transporter          | 7.12                  | Pectinase                   | 5.74                  |
| MFS sugar transporter          | 7.06                  | Hypothetical protein        | 5.71                  |
| Cellulase                      | 6.8                   | Cellulase                   | 5.68                  |
| MFS sugar transporter          | 6.7                   | Pectinase                   | 5.67                  |

383

### 384 *CAZymes distribution in DEGs*

385 The striking number of CAZymes in the highly differentially expressed gene list, prompted us to  
386 investigate their distribution throughout the upregulated DEGs. We found that CAZymes comprise 125  
387 out of 466 genes (27%) that are upregulated in *B. cinerea* infecting *iqd1-1* plants, while only 18 out of  
388 212 genes (8%) were upregulated in *B. cinerea* that infect WT. The largest group (80 genes, 64%) of  
389 the CAZymes belong to the glycoside hydrolase family that constitute lytic enzymes like cellulases  
390 and hemicellulases. The second largest group (22 genes, 18%) are carbohydrate esterases that  
391 incorporate pectin catabolic enzymes. The remaining CAZymes operate on other constituents of the

## IQD1 involvement in plant defense

392 plant's cell wall or play an auxiliary role to other enzymes (**Figure S6**).

### 393 **DISCUSSION**

394 This study aimed to elucidate the molecular functions of the *A. thaliana* IQD1 protein in defense  
395 responses against the plant pathogen *B. cinerea*. A previous work with IQD1 mutants showed that the  
396 expression levels of *IQD1* in different *A. thaliana* lines is correlated with steady state accumulation of  
397 glucosinolates. Moreover, they showed that overexpressing *IQD1* has the beneficial characteristic of  
398 reducing insect herbivory of generalist insects (Levy et al., 2005). By using the necrotrophic fungal  
399 pathogen *B. cinerea*, we sought to investigate the cellular and genetic pathways in which IQD1 is  
400 regulated and affects the plant defense response. Inoculating the *IQD1<sup>OXp</sup>* and *iqd1-1* lines with *B.*  
401 *cinerea* spore suspension proved the correlation between *IQD1*'s expression levels and *A. thaliana*  
402 resistance to the fungal pathogen (**Figure 1**), as well as providing us with a simple host-pathogen  
403 system to conduct genetic screening. It was already known from our previous study that the *iqd1-1*  
404 knockout plant accumulates low levels of GS (Levy et al., 2005), In the current study, we also validate  
405 that *iqd1-1* express abnormally several of GS biosynthesis and regulation genes compared to WT plants  
406 (**Table 2**).

407 Information obtained from genome wide expression profiling of *iqd1-1* and WT plants following mock  
408 treatment or *B. cinerea* infection, helped us understand which plant metabolic processes were affected  
409 by the absence of IQD1. The latest genome model released for *A. thaliana* (TAIR10) contains about  
410 27,000 protein coding genes (Lamesch *et al.*, 2012). We showed that approximately 3500 genes  
411 (roughly 13% of all coding genes) were differentially expressed in the non-infected IQD1 knockout  
412 vs. WT plants (**Figure S1A** and **Table S2**). Furthermore, 70% of the genes which were downregulated  
413 in *iqd1-1* comprising diverse functions like transporters, DNA repair and gene regulation. Of notice is  
414 the large number of downregulated genes in *iqd1-1* responsible for plant defense against biotic stresses,  
415 such as cell wall remodelling proteins, signalling factors and resistance genes (**Figure 2**). Such a

## **IQD1 involvement in plant defense**

416 massive impairment of the plant defense apparatus is likely to explain the enhanced sensitivity of the  
417 knockout plants to insect and pathogen attacks (Levy et al., 2005; **Figure 1**). The ERF genes are a large  
418 family of ethylene responsive transcription factors that regulate important biological processes related  
419 to plant growth, development and plant defense (Nakano et al., 2006) (Li *et al.*, 2019). This gene family  
420 was largely upregulated in the *iqd1-1* mutant (**Figure 2, Table 1**). The increased sensitivity to ethylene  
421 may explain several phenotypes displayed by this line such as rapid growth, large sized leaves and  
422 early development of stems and seed pods compared to WT plants (Levy et al., 2005). As demonstrated  
423 in **Figure 6** and former study, ethylene can effect glucosinolate biosynthesis (Mikkelsen *et al.*, 2003)  
424 and its signalling components EIN2 and ETO1 act downstream to IQD1 controlling defense and GS  
425 accumulation.

426 Upon inoculation with *B. cinerea*, both the WT (**Figure S2**) and *iqd1-1* (**Figure S3**) plants have a  
427 similar basic transcriptional response. The plants shut down the energy consuming photosynthesis  
428 machinery while concentrating on fighting off the invading pathogen. The difference is that the WT  
429 plants are able to express more defense related genes like germins and R-genes (**Figure 2B**), thus resist  
430 the fungal infection more effectively than *iqd1-1*.

431 The three plant hormones SA, JA and ethylene play a major role in response to biotic stresses by  
432 mediating endogenous signalling that activates the expression of plant defense genes (Dong, 1998,  
433 Clarke *et al.*, 2000, Li et al., 2019). Analysis of RNA-Seq data of *iqd1-1* indicates that IQD1 is  
434 involved in all three major defense hormones pathways (**Table 1**). While we see transcriptional  
435 changes in genes controlling all important plant hormones between WT and mutant plants, ethylene  
436 pathway genes are mainly upregulated in *iqd1-1* (see above), contrary to SA and JA pathway genes  
437 that show opposite characteristics (**Table 1**). Using the *IQD1<sup>pro</sup>:GUS* reporter line we showed that  
438 exogenous application of SA or Flg22 downregulates IQD1 expression, while JA and chitin treatment  
439 leads to the opposite effect of activating IQD1 (**Figure 3A, 3B**). Further confirmation of the link

## IQD1 involvement in plant defense

440 between IQD1 activity and the JA pathway came from LC/MS quantification of hormone accumulation  
441 in IQD1 mutants. We observed lower steady-state JA levels in the *iqd1-1* mutant plants compared to  
442 WT while SA levels were significantly increased (**Figure 3C**). We can speculate that IQD1 suppress  
443 the accumulation of SA while activating the JA accumulation (**Figure 8, Figure 3C and Table 1**). It  
444 is clear from former publications that glucosinolate accumulation and metabolism is under control of  
445 different hormone signaling and several studies demonstrated similarly to us that changes in  
446 glucosinolate levels altered hormone levels such as JA, ET and ABA (Mikkelsen et al., 2003,  
447 Dombrecht *et al.*, 2007, Malitsky *et al.*, 2008, Morant *et al.*, 2010, Chen *et al.*, 2011, Mitreiter &  
448 Gigolashvili, 2021). As a conclusion to the results presented above, we hypothesize that the opposite  
449 effect on SA and JA levels might suggest the involvement of IQD1 in the synergistic effect between  
450 the JA and SA pathways that was well documented (**Figure 8**) (Pieterse *et al.*, 2012, Koornneef &  
451 Pieterse, 2008, Li et al., 2019).

452 Based on epistasis data obtained from *B. cinerea* inoculation of detached leaves and GS concentration  
453 measurement by HPLC, we managed to investigate IQD1's integration into the three main defense  
454 hormone-signalling pathways. Overexpression of *IQD1* did not alter the resistance/sensitivity or  
455 measured GS levels in all the SA and ethylene pathway mutants we checked (**Figure 4, 6**), assuming  
456 it more likely acts parallel to them but might also act upstream for defense activation and GS  
457 accumulation (**Figure 8**). However, while indole GS content in the *jar1* plants was higher even than  
458 the *IQD1<sup>OXp</sup>* line, most likely due to the increase of several JA conjugates in the single mutant as  
459 described before by (Staswick and Tiryaki, 2004), the *jar1:IQD1<sup>OXp</sup>* cross plants accumulate  
460 significant less indole GS than the *jar1* plants and comparable to WT levels (**Figure 5**). Those results  
461 are an additional proof of the connection between IQD1 and the JA pathway. We hypothesize that  
462 IQD1 acts upstream to the JA signalling pathway and dependent on JAR1 controlling indole GS



## IQD1 involvement in plant defense

463 accumulation. IQD1 is also controlling JA accumulation by activating JA biosynthesis genes (**Table**  
464 **1**) and activated by the JA via positive feedback loop (for model see **Figure 8**).

465

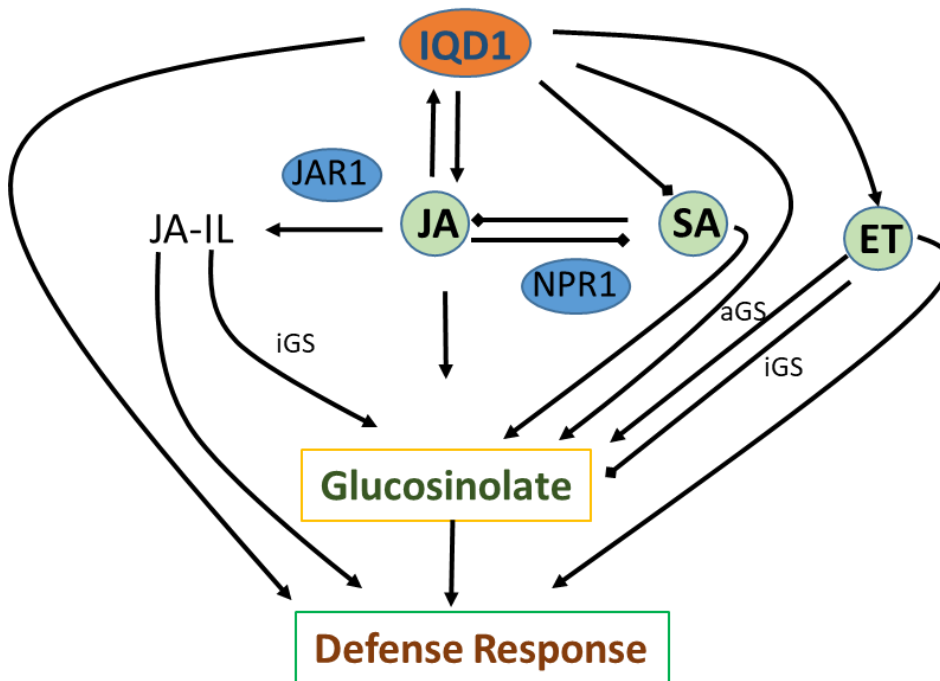

466

467 **Figure 8. Suggested model of IQD1 involvement in glucosinolate accumulation and defense**  
468 **response.** JA-II, Jasmonic acid isoleucine; aGS, aliphatic glucosinolate; iGS, indolic glucosinolate.

469 The extensive volume of data obtained during the RNA-Seq experiment, enabled us to investigate also  
470 the properties of *B. cinerea* infection on *iqd1-1* plants compared to WT (**Figure 7A**). Examination of  
471 the differentially expressed genes revealed that upon infection of *iqd1-1*, the fungus expresses an  
472 extensive array of Carbohydrate-Active-Enzymes (CAZymes) and membrane transporters, which  
473 facilitate the penetration and breakdown of plant tissues (**Table 3, Figure S6**). It has been proposed  
474 that *B. cinerea* is able to fine tune the expression of activated CAZymes according to the host's cell  
475 wall carbohydrate composition (Blanco-Ulate et al., 2014). We hypothesize that once early penetration  
476 of the leaf tissue occurs, the fungus senses the weakness of the *iqd1-1*'s defense response and reacts by

## **IQD1 involvement in plant defense**

477 overexpressing CAZymes in order to rapidly break down the physical barriers of the plant cells (**Table**  
478 **3, Figure S6**). We conclude that *B. cinerea* infection is more aggressive on *iqd1-1*, as the fungus takes  
479 advantage of the enhanced sensitivity of the mutant line described earlier.

480 In conclusion, we demonstrated in the current study that altered expression of *A. thaliana* IDQ1 has a  
481 profound effect on global expression of genes in the plant but also in the pathogen. Moreover, its  
482 expression correlates with GS levels, defense signalling and with *B. cinerea* pathogenicity function.

483

## **EXPERIMENTAL PROCEDURES**

### **Plant lines and growth conditions**

486 This work was carried out using the following *A. thaliana* (L.) Heynh. background lines: Columbia  
487 (*Col-0*), Wassilewskija (*Ws-0*) and Landsberg erecta (*Ler*). The following mutants and transgenic  
488 plants were used in *Col-0* background: *IQD1<sup>OXF</sup>* (Levy et al., 2005), *NahG* (Delaney et al., 1994), *npr1-*  
489 *1* (Cao Hui et al., 1994), *aos* (Park et al., 2002), *coi1* (Xie et al., 1998), *jar1-1* (Staswick et al., 1992),  
490 *ein2-1* (Guzmán and Ecker, 1990), *eto1-1* (Guzmán and Ecker, 1990), *pad3-1* (Zhou et al., 1999) and  
491 *cyp79B2/B3* (Zhao et al., 2002). In *Ler* background: *iqd1-2* gene trap line GT6935 (Levy et al., 2005).  
492 In *Ws-0* background: T-DNA insertion line *iqd1-1* (Levy et al., 2005). All seeds were stratified on  
493 moist soil at 4°C for 2 to 3 days before placing them in a growth chamber. Arabidopsis plants were  
494 grown at 22°C and 60% relative humidity under illumination with fluorescent and incandescent light  
495 at a photofluency rate of approximately 120  $\mu\text{mol m}^{-2} \text{s}^{-1}$ , day length was 10 hours unless otherwise  
496 specified.

497 To obtain double mutants, each individual mutant was crossed with the *IQD1<sup>OXF</sup>* line. F1 populations  
498 were screened on Basta herbicide (glufosinate ammonium). Double homozygous mutants were

## **IQD1 involvement in plant defense**

499 identified in the F2 populations by PCR analysis with allele-specific primer pairs listed in Table S9.  
500 These plants were self-crossed and further progeny from a homozygous line was used for experiments.

### **501 Fungal strains, growth and inoculation method**

502 *Botrytis cinerea* (GRAPE isolate) was grown on potato dextrose agar (PDA; Difco, France) in a  
503 controlled-environment chamber kept at 22°C under fluorescent and incandescent light at a  
504 photofluency rate of approximately 120  $\mu\text{mol m}^{-2} \text{s}^{-1}$  and a 10/14 hours photoperiod.

505 Conidia were harvested in sterile distilled water and filtered through a 45  $\mu\text{m}$  cell strainer to remove  
506 hyphae. For inoculation, the conidial suspension was adjusted to 1,500 conidia/ $\mu\text{l}$  in half-strength  
507 filtered (0.45  $\mu\text{m}$ ) grape juice (pure organic). Leaves were inoculated with 4  $\mu\text{l}$  droplets of conidial  
508 suspension prior to RNA purification. Detached leaves from the different genotypes were layered on  
509 trays of water-agar media and inoculated with 4  $\mu\text{l}$  droplets of conidial suspension. Lesions were  
510 measured using ASSESS 2.0, image analysis software for plant disease quantification (APS Press, St.  
511 Paul, MN, USA).

### **512 GUS histochemical assay**

513 To carry out GUS reporter gene staining assays, *iqd1-2* (GT6935 line) seeds were sterilized in (70%  
514 ethanol, 0.05% tween 20) for 5 min, washed with 100% ethanol and left to air dry. Seeds were  
515 germinated in 12-well microtiter dishes sealed with parafilm, each well containing 3 seeds and 2 ml  
516 seedling growth medium (SGM; 0.5x Murashige and Skoog basal medium with vitamins [Duchefa,  
517 Haarlem, The Netherlands] containing 0.5 g/L MES hydrate and 1% sucrose at pH 5.7). Seedlings were  
518 grown for 14 days in a growth chamber with continuous shaking at 100 rpm before treatment with  
519 elicitors. Elicitors were used at the following concentrations: 100  $\mu\text{M}$  SA, 100  $\mu\text{M}$  JA, 100 nM Flg22  
520 and 500  $\mu\text{g/mL}$  chitin. 18 hours after treatment with elicitors, 2 ml of GUS substrate solution (125 mM  
521 sodium phosphate pH 7, 1.25 mM EDTA, 1.25 mM  $\text{K}_4[\text{Fe}(\text{CN})_6]$ , 1.25 mM  $\text{K}_3[\text{Fe}(\text{CN})_6]$ , 0.5 mM X-

## **IQD1 involvement in plant defense**

522 Gluc and 1.25% Triton X-100) was poured in each well. The plants were vacuum-infiltrated for 10 min  
523 and then incubated at 37°C overnight covered in aluminum foil. Tissues were destained with 100%  
524 ethanol overnight and placed in 70% ethanol before digital pictures were taken.

## **LC/MS quantification of salicylic, jasmonic and abscisic acid**

526 Quantitative analysis of plant hormones was accomplished using LC-MS/MS system which consisted  
527 of a 1200 series Rapid Resolution liquid chromatography system (vacuum micro degasser G1379B,  
528 binary pump G1312B, autosampler G1367C and thermal column compartment G1316B) coupled to  
529 6410 triple quadrupole mass selective detector (Agilent Technologies, Santa Clara, CA, USA). Analytes  
530 were separated on an Acclaim C18 RSLC column (2.1×150 mm, particle size 2.2 µm, Dionex) upon  
531 HPLC conditions described in Table S10.

532 Mass spectrometer was operated in negative ionization mode, ion source parameters were as follows:  
533 capillary voltage 3500V, drying gas (nitrogen) temperature and flow 350°C and 10 l/min respectively,  
534 nebulizer pressure 35 psi, nitrogen (99.999%) was used as a collision gas. The LC-MS system was  
535 controlled and data were analyzed using MassHunter software (Agilent Technologies). Quantitative  
536 analysis of plant hormones was accomplished in multiple reaction monitoring (MRM) mode,  
537 isotopically labeled analogues were used as internal standards. MRM parameters are listed in Table  
538 S11.

## **Glucosinolate extraction and purification**

540 Six weeks old soil grown *A. thaliana* seedlings were weighted and lyophilized. GS were extracted with  
541 80% methanol supplemented with sinigrin as internal standard. The extracted GS were purified on a  
542 Multiscreen 96 wells filter plate loaded with 45 µl DEAE-sephadex A25 anion exchange beads. The  
543 plate was washed once with distilled water, loaded with 200 µl of the GS extract and then washed with  
544 80% methanol followed by two washes with distilled water. Elution was done by treating the plate with

## **IQD1 involvement in plant defense**

545 100  $\mu$ l of 3.5 mg/ml type H-1 aryl-sulfatase for an overnight reaction at room temperature, followed  
546 by a second elution with 100  $\mu$ l distilled water.

### **547 1.1 Glucosinolates quantification**

548 20  $\mu$ l of GS solution were run on a Thermo Scientific HPLC system at 1 ml/min. The column was a  
549 Luna C18(2), 150x4.6 mm, 5  $\mu$ m (Phenomenex). The mobile phases were water (A) and acetonitrile  
550 (B), running time: 40 min. The gradient changed as follows: 1.5% B for 2.5 min, 20% B for 9 min,  
551 20% B for 6 min, 95% B for 3 min and 1.5% B for 3 min. Afterwards, the column was equilibrated at  
552 1.5% B for 16.5 min. The GS were detected with a UV detector at 226 nm. The amount of each GS  
553 was back calculated and expressed in nanomoles per milligram (nmols/mg) of fresh weight.

### **554 RNA isolation**

555 Total RNA was isolated from 6-week-old soil grown *Arabidopsis* rosette leaves 48 hours after  
556 inoculation with *B. cinerea*, jasmonic acid treatment or half-strength grape juice as control. RNA was  
557 extracted with TRI-Reagent (Sigma-Aldrich, St. Louis, MO, USA), followed by treatment with  
558 TURBO DNA-free (Ambion, Waltham, MA, USA) to remove genomic DNA contamination. Gel  
559 electrophoresis, NanoDrop 2000 spectrophotometer (Thermo Scientific, Waltham, MA) and  
560 TapeStation Instrument (Agilent Technologies, Santa Clara, CA) were used to determine the quality  
561 and quantity of the RNA. Following extraction, the RNA was stored at -80°C for subsequent analysis.

### **562 cDNA library construction and sequencing**

563 RNA samples were subjected to poly-A selection in order to select for mRNA specifically, randomly  
564 fragmented and reverse transcribed to cDNA. Adaptors that contain sample-specific indexes were  
565 ligated to the fragments in order to tag each sample and size-specific magnetic beads were used for  
566 fragment size selection. Enrichment of adaptor-bound inserts was achieved by PCR amplification,

## **IQD1 involvement in plant defense**

567 thereby enabling sample quantification for loading onto the sequencer. Illumina HiSeq 2500 system  
568 (Illumina Inc., San Diego, CA, USA) was used to sequence 50bp single reads.

569 Raw reads from each sample were processed by removing primer and adaptor sequences. The  
570 sequences quality per base was evaluated using FastQC v0.10.1, and low quality reads (Q-value < 30)  
571 were subsequently filtered out. The clean reads were aligned with TopHat v2.0.11 software against the  
572 *A. thaliana* genome (downloaded from the Ensembl Plants website) or the *Botrytis cinerea* genome  
573 (downloaded from the Broad Institute website) as references. Three mapping attempts were done in  
574 order to determine how many mismatches should be allowed per read (1, 3 or 5 mismatches) and the  
575 mapping files with up to 3 mismatches were used. The mapped reads were assigned to genes or  
576 transcripts based on the gene annotations file using HTSeq-count v.0.6.1 with the union mode.

### **577 Analysis of gene expression and functional annotation**

578 The differential gene expression was calculated by generating a matrix of normalized counts using the  
579 DESeq package v1.14.0. A threshold for false discovery rate (FDR) < 0.05 and fold change (FC) > 4  
580 were used to determine significant differences in gene expression. Genes with FC < 4 were not  
581 considered to be differentially expressed and were therefore discarded.

582 Functional annotation of differentially expressed genes was carried out using DAVID (Database for  
583 Annotation, Visualization and Integrated Discovery) bioinformatics resources v6.7, the MapMan  
584 bioinformatics tool v3.5.1R2 and the Blast2Go bioinformatics software v3.1.

### **585 Quantitative reverse-transcription PCR analysis**

586 Total RNA (1 µg) was reverse transcribed with High Capacity cDNA Reverse Transcription Kit  
587 (Applied Biosystems, Waltham, MA, USA). Quantitative reverse transcription PCR was performed  
588 with the SYBR master mix and StepOne real-time PCR machine (Applied Biosystems, Waltham, MA,

## **IQD1 involvement in plant defense**

589 USA). The thermal cycling program was as follows: 95°C for 20 seconds and 40 cycles of 95°C for 3  
590 seconds and 60°C for 30 seconds. Relative fold change in gene expression normalized to *Atef1a*  
591 (eukaryotic translation elongation factor 1 alpha) or *Bcactin* (*Bc1G\_08198*) was calculated by the  
592 comparative cycle threshold  $2^{-\Delta\Delta C_t}$  method. Primers used in qRT-PCR analysis of *A. thaliana* are listed  
593 in Table S12 and for *B. cinerea* in Table S13.

### **594 Statistical analysis**

595 Student's t test was performed when data was normally distributed and the sample variances were equal.  
596 For multiple comparisons, one-way ANOVA was performed when the equal variance test was passed.  
597 Significance was accepted at  $p < 0.05$ . All experiments described here are representative of at least  
598 three independent experiments with the same pattern of results.

599

### **600 DATA STATEMENT**

601 All supporting information is available from *The Plant Journal* website.

### **602 ACCESSION NUMBERS**

603 IQD1 At3g09710

### **604 Acknowledgements**

605 Funding: IS-4210-09 from the Binational Agricultural Research and Development (BARD)

606

### **607 AUTHOR CONTRIBUTIONS**

608 OB and ML designed the experiments. OB performed the majority of the experiments and analyzed  
609 the data, with assistance from ML. OB and ML wrote the article together.

### **610 CONFLICT OF INTEREST**

611 The authors declare no competing financial interests.

612



## IQD1 involvement in plant defense

### 613 REFERENCES

- 614 Abel, S., Bürstenbinder, K. and Müller, J. (2013) The emerging function of IQD proteins as scaffolds  
615 in cellular signaling and trafficking.
- 616 Abel, S., Savchenko, T. and Levy, M. (2005) Genome-wide comparative analysis of the IQD gene  
617 families in *Arabidopsis thaliana* and *Oryza sativa*. *BMC Evol Biol*, **5**, 72.
- 618 AbuQamar, S. F., Moustafa, K. and Tran, L. S. (2016) 'Omics' and Plant Responses to *Botrytis cinerea*.  
619 *Frontiers in plant science*, **7**, 1658.
- 620 Barth, C. and Jander, G. (2006) *Arabidopsis* myrosinases TGG1 and TGG2 have redundant function  
621 in glucosinolate breakdown and insect defense. *Plant J*, **46**, 549-562.
- 622 Bednarek, P., Pislewska-Bednarek, M., Svatos, A., Schneider, B., Doubsky, J., Mansurova, M., *et al.*  
623 (2009) A glucosinolate metabolism pathway in living plant cells mediates broad-spectrum  
624 antifungal defense. *Science*, **323**, 101-106.
- 625 Blanco-Ulate, B., Morales-Cruz, A., Amrine, K. C., Labavitch, J. M., Powell, A. L. and Cantu, D.  
626 (2014) Genome-wide transcriptional profiling of *Botrytis cinerea* genes targeting plant cell  
627 walls during infections of different hosts. *Front Plant Sci*, **5**, 435.
- 628 Breithaupt, C., Strassner, J., Breitingner, U., Huber, R., Macheroux, P., Schaller, A., *et al.* (2001) X-ray  
629 structure of 12-Oxophytodienoate reductase 1 provides structural insight into substrate binding  
630 and specificity within the family of OYE. *Structure*.
- 631 Buxdorf, K., Yaffe, H., Barda, O. and Levy, M. (2013) The effects of glucosinolates and their  
632 breakdown products on necrotrophic fungi. *PLoS One*, **8**, e70771.
- 633 Bürstenbinder, K., Savchenko, T., Müller, J., Adamson, A. W., Stamm, G., Kwong, R., *et al.* (2013)  
634 *Arabidopsis* calmodulin-binding protein iq67-domain 1 localizes to microtubules and interacts  
635 with kinesin light chain-related protein-1. *Journal of Biological Chemistry*.
- 636 Cai, R., Zhang, C., Zhao, Y., Zhu, K., Wang, Y., Jiang, H., *et al.* (2016) Genome-wide analysis of the  
637 IQD gene family in maize. *Molecular Genetics and Genomics*.
- 638 Chen, S. X., Glawischnig, E., Jorgensen, K., Naur, P., Jorgensen, B., Olsen, C. E., *et al.* (2003)  
639 CYP79F1 and CYP79F2 have distinct functions in the biosynthesis of aliphatic glucosinolates  
640 in *Arabidopsis*. *Plant Journal*, **33**, 923-937.
- 641 Chen, Y., Yan, X. and Chen, S. (2011) Bioinformatic analysis of molecular network of glucosinolate  
642 biosynthesis. *Comput Biol Chem*, **35**, 10-18.
- 643 Clarke, J. D., Volko, S. M., Ledford, H., Ausubel, F. M. and Dong, X. (2000) Roles of salicylic acid,  
644 jasmonic acid, and ethylene in cpr-Induced resistance in *Arabidopsis*. *Plant Cell*.
- 645 Clay, N. K., Adio, A. M., Denoux, C., Jander, G. and Ausubel, F. M. (2009) Glucosinolate metabolites  
646 required for an *Arabidopsis* innate immune response. *Science*, **323**, 95-101.
- 647 Dombrecht, B., Xue, G. P., Sprague, S. J., Kirkegaard, J. A., Ross, J. J., Reid, J. B., *et al.* (2007) MYC2  
648 Differentially Modulates Diverse Jasmonate-Dependent Functions in *Arabidopsis*.  
649 *The Plant Cell*, **19**, 2225.
- 650 Dong, X. (1998) SA, JA, ethylene, and disease resistance in plants. *Current Opinion in Plant Biology*.
- 651 Feng, L., Chen, Z., Ma, H., Chen, X., Li, Y., Wang, Y., *et al.* (2014) The IQD gene family in soybean:  
652 Structure, phylogeny, evolution and expression. *PLoS ONE*.



## **IQD1 involvement in plant defense**

- 653 Ferrari, S., Plotnikova, J. M., De Lorenzo, G. and Ausubel, F. M. (2003) Arabidopsis local resistance  
654 to *Botrytis cinerea* involves salicylic acid and camalexin and requires EDS4 and PAD2, but not  
655 SID2, EDS5 or PAD4. *Plant J*, **35**, 193-205.
- 656 Filiz, E., Tombuloglu, H. and Ozyigit, I. I. (2013) Genome wide analysis of IQ67 domain (IQD) gene  
657 families in *Brachypodium distachyon*. *Plant OMICS*.
- 658 Frerigmann, H. and Gigolashvili, T. (2014) MYB34, MYB51, and MYB122 distinctly regulate indolic  
659 glucosinolate biosynthesis in *Arabidopsis thaliana*. *Mol Plant*, **7**, 814-828.
- 660 Garron, M. L. and Henrissat, B. (2019) The continuing expansion of CAZymes and their families.
- 661 Gilchrist, D. G. (1998) Programmed cell death in plant disease: The purpose and promise of cellular  
662 suicide. *Annual Review of Phytopathology*.
- 663 Glazebrook, J. (2005) Contrasting mechanisms of defense against biotrophic and necrotrophic  
664 pathogens. *Annu Rev Phytopathol*, **43**, 205-227.
- 665 Govrin, E. M. and Levine, A. (2000) The hypersensitive response facilitates plant infection by the  
666 necrotrophic pathogen *Botrytis cinerea*. *Curr Biol*, **10**, 751-757.
- 667 Grebner, W., Stingl, N. E., Oenel, A., Mueller, M. J. and Berger, S. (2013) Lipoxygenase6-dependent  
668 oxylipin synthesis in roots is required for abiotic and biotic stress resistance of *Arabidopsis*.  
669 *Plant Physiology*.
- 670 Halkier, B. A. and Gershenzon, J. (2006) Biology and biochemistry of glucosinolates. *Annu Rev Plant*  
671 *Biol*, **57**, 303-333.
- 672 Heath, M. C. (2000a) Hypersensitive response-related death. *Plant Molecular Biology*.
- 673 Heath, M. C. (2000b) Nonhost resistance and nonspecific plant defenses.
- 674 Huang, Z., Van Houten, J., Gonzalez, G., Xiao, H. and van der Knaap, E. (2013) Genome-wide  
675 identification, phylogeny and expression analysis of SUN, OFP and YABBY gene family in  
676 tomato. *Mol Genet Genomics*, **288**, 111-129.
- 677 Jancowski, S., Catching, A., Pighin, J., Kudo, T., Foissner, I. and Wasteneys, G. O. (2014) Trafficking  
678 of the myrosinase-associated protein GLL23 requires NUC/MVP1/GOLD36/ERMO3 and the  
679 p24 protein CYB. *Plant Journal*.
- 680 Kliebenstein, D. J., Rowe, H. C. and Denby, K. J. (2005) Secondary metabolites influence  
681 *Arabidopsis/Botrytis* interactions: variation in host production and pathogen sensitivity. *The*  
682 *Plant Journal*, **44**, 25-36.
- 683 Koornneef, A. and Pieterse, C. M. (2008) Cross talk in defense signaling. *Plant Physiol*, **146**, 839-844.
- 684 Lambrix, V., Reichelt, M., Mitchell-Olds, T., Kliebenstein, D. J. and Gershenzon, J. (2001) The  
685 *Arabidopsis* epithiospecifier protein promotes the hydrolysis of glucosinolates to nitriles and  
686 influences *Trichoplusia ni* herbivory. *Plant Cell*, **13**, 2793-2807.
- 687 Lamesch, P., Berardini, T. Z., Li, D., Swarbreck, D., Wilks, C., Sasidharan, R., *et al.* (2012) The  
688 *Arabidopsis* Information Resource (TAIR): Improved gene annotation and new tools. *Nucleic*  
689 *Acids Research*.
- 690 Levy, M., Wang, Q., Kaspi, R., Parrella, M. P. and Abel, S. (2005) *Arabidopsis* IQD1, a novel  
691 calmodulin-binding nuclear protein, stimulates glucosinolate accumulation and plant defense.  
692 *The Plant Journal*, **43**, 79-96.

## **IQD1 involvement in plant defense**

- 693 Li, J., Hansen, B. G., Ober, J. A., Kliebenstein, D. J. and Halkier, B. A. (2008) Subclade of flavin-  
694 monooxygenases involved in aliphatic glucosinolate biosynthesis. *Plant Physiology*.
- 695 Li, N., Han, X., Feng, D., Yuan, D. and Huang, L. J. (2019) Signaling Crosstalk between Salicylic  
696 Acid and Ethylene/Jasmonate in Plant Defense: Do We Understand What They Are  
697 Whispering? *Int J Mol Sci*, **20**.
- 698 Li, Y., Deng, M., Liu, H., Li, Y., Chen, Y., Jia, M., *et al.* (2020) ABNORMAL SHOOT 6 interacts  
699 with KATANIN 1 and SHADE AVOIDANCE 4 to promote cortical microtubule severing and  
700 ordering in Arabidopsis. *Journal of Integrative Plant Biology*.
- 701 Li, Y., Sawada, Y., Hirai, A., Sato, M., Kuwahara, A., Yan, X., *et al.* (2013) Novel insights into the  
702 function of Arabidopsis R2R3-MYB transcription factors regulating aliphatic glucosinolate  
703 biosynthesis. *Plant Cell Physiol*, **54**, 1335-1344.
- 704 López, M. A., Vicente, J., Kulasekaran, S., Vellosillo, T., Martínez, M., Irigoyen, M. L., *et al.* (2011)  
705 Antagonistic role of 9-lipoxygenase-derived oxylipins and ethylene in the control of oxidative  
706 stress, lipid peroxidation and plant defence. *Plant Journal*.
- 707 Ma, H., Feng, L., Chen, Z., Chen, X., Zhao, H. and Xiang, Y. (2014) Genome-wide identification and  
708 expression analysis of the IQD gene family in *Populus trichocarpa*. *Plant Science*.
- 709 Malitsky, S., Blum, E., Less, H., Venger, I., Elbaz, M., Morin, S., *et al.* (2008) The transcript and  
710 metabolite networks affected by the two clades of Arabidopsis glucosinolate biosynthesis  
711 regulators. *Plant Physiol*, **148**, 2021-2049.
- 712 Mikkelsen, M. D., Hansen, C. H., Wittstock, U. and Halkier, B. A. (2000) Cytochrome P450CYP79B2  
713 from Arabidopsis catalyzes the conversion of tryptophan to indole-3-acetaldoxime, a precursor  
714 of indole glucosinolates and indole-3-acetic acid. *Journal of Biological Chemistry*, **275**, 33712-  
715 33717.
- 716 Mikkelsen, M. D., Petersen, B. L., Glawischnig, E., Jensen, A. B., Andreasson, E. and Halkier, B. A.  
717 (2003) Modulation of CYP79 genes and glucosinolate profiles in Arabidopsis by defense  
718 signaling pathways. *Plant Physiol*, **131**, 298-308.
- 719 Mitreiter, S. and Gigolashvili, T. (2021) Regulation of glucosinolate biosynthesis. *J Exp Bot*, **72**, 70-  
720 91.
- 721 Morant, M., Ekstrøm, C., Ulvskov, P., Kristensen, C., Rudemo, M., Olsen, C. E., *et al.* (2010)  
722 Metabolomic, transcriptional, hormonal, and signaling cross-talk in superroot2. *Mol Plant*, **3**,  
723 192-211.
- 724 Müller, M. and Munné-Bosch, S. (2015) Ethylene response factors: A key regulatory hub in hormone  
725 and stress signaling. *Plant Physiology*.
- 726 Nguyen, V. P. T., Stewart, J., Lopez, M., Ioannou, I. and Allais, F. (2020) Glucosinolates: Natural  
727 Occurrence, Biosynthesis, Accessibility, Isolation, Structures, and Biological Activities.  
728 *Molecules*, **25**.
- 729 Niño-González, M., Novo-Uzal, E., Richardson, D. N., Barros, P. M. and Duque, P. (2019) More  
730 Transporters, More Substrates: The Arabidopsis Major Facilitator Superfamily Revisited.
- 731 Pieterse, C. M., Van der Does, D., Zamioudis, C., Leon-Reyes, A. and Van Wees, S. C. (2012)  
732 Hormonal modulation of plant immunity. *Annu Rev Cell Dev Biol*, **28**, 489-521.
- 733 Podolak, I., Galanty, A. and Sobolewska, D. (2010) Saponins as cytotoxic agents: A review.

## IQD1 involvement in plant defense

- 734 Sundaresan, V., Springer, P., Volpe, T., Haward, S., Jones, J. D., Dean, C., *et al.* (1995) Patterns of  
735 gene action in plant development revealed by enhancer trap and gene trap transposable  
736 elements. *Genes Dev*, **9**, 1797-1810.
- 737 Tam, J. P., Wang, S., Wong, K. H. and Tan, W. L. (2015) Antimicrobial peptides from plants.
- 738 Textor, S., Bartram, S., Kroymann, J., Falk, K. L., Hick, A., Pickett, J. A., *et al.* (2004) Biosynthesis  
739 of methionine-derived glucosinolates in *Arabidopsis thaliana*: Recombinant expression and  
740 characterization of methylthioalkylmalate synthase, the condensing enzyme of the chain-  
741 elongation cycle. *Planta*.
- 742 Viswanath, K. K., Varakumar, P., Pamuru, R. R., Basha, S. J., Mehta, S. and Rao, A. D. (2020) Plant  
743 Lipoxigenases and Their Role in Plant Physiology.
- 744 Vuorinen, K., Zamora, O., Vaahtera, L., Overmyer, K. and Brosché, M. (2021) Dissecting Contrasts  
745 in Cell Death, Hormone, and Defense Signaling in Response to. *Mol Plant Microbe Interact*,  
746 **34**, 75-87.
- 747 Wittstock, U. and Halkier, B. A. (2002) Glucosinolate research in the *Arabidopsis* era. *Trends in Plant*  
748 *Science*, **7**, 263-270.
- 749 Wu, M., Li, Y., Chen, D., Liu, H., Zhu, D. and Xiang, Y. (2016) Genome-wide identification and  
750 expression analysis of the IQD gene family in moso bamboo (*Phyllostachys edulis*). *Scientific*  
751 *Reports*.
- 752 Xiao, H., Jiang, N., Schaffner, E., Stockinger, E. J. and van der Knaap, E. (2008) A retrotransposon-  
753 mediated gene duplication underlies morphological variation of tomato fruit. *Science*, **319**,  
754 1527-1530.
- 755 Yan, N. (2015) Structural Biology of the Major Facilitator Superfamily Transporters. *Annual Review*  
756 *of Biophysics*.
- 757 Yang, X., Kirungu, J. N., Magwanga, R. O., Xu, Y., Pu, L., Zhou, Z., *et al.* (2019) Knockdown of  
758 GhIQD31 and GhIQD32 increases drought and salt stress sensitivity in *Gossypium hirsutum*.  
759 *Plant Physiology and Biochemistry*.
- 760 Yuan, J., Liu, T., Yu, Z., Li, Y., Ren, H., Hou, X., *et al.* (2019) Genome-wide analysis of the Chinese  
761 cabbage IQD gene family and the response of BrIQD5 in drought resistance. *Plant Molecular*  
762 *Biology*.
- 763 Zentella, R., Zhang, Z.-L., Park, M., Thomas, S. G., Endo, A., Murase, K., *et al.* (2007) Global Analysis  
764 of DELLA Direct Targets in Early Gibberellin Signaling in *Arabidopsis*. *Plant Cell*, **19**, 3037-  
765 3057.
- 766 Zhang, Z., Ober, J. A. and Kliebenstein, D. J. (2006) The gene controlling the quantitative trait locus  
767 EPITHIOSPECIFIER MODIFIER1 alters glucosinolate hydrolysis and insect resistance in  
768 *Arabidopsis*. *Plant Cell*, **18**, 1524-1536.

769
